# Supplementary material for: Do sleep quality and caffeine consumption mediate the relationship between late chronotype and body mass index?
Source: Royal Society of Chemistry journal article supplement (doi:10.1039/d0fo03435e), 2021-01-01
Supplement: d0fo03435e1.pdf [file d0fo03435e1.pdf]

ARTICLE

Appendix 1. Caffeine content of food and drinks

| Food and Drinks                           | Caffeine content (mg / 100 g) |
|-------------------------------------------|-------------------------------|
| <b>Caffeinated Drinks</b>                 |                               |
| Black tea (brewed)                        | 20                            |
| Black tea (bag)                           | 24                            |
| Green tea (brewed)                        | 18                            |
| Green tea (bag)                           | 11                            |
| Turkish coffee                            | 60                            |
| Nescafe (classic)                         | 44                            |
| Nescafe (gold)                            | 26                            |
| Nescafe (decaffeinated)                   | 2                             |
| Cappuccino                                | 11                            |
| Nescafe 3 in 1                            | 22                            |
| Nescafe 2 in 1                            | 23                            |
| Hot chocolate                             | 2                             |
| Chocolate milkshake                       | 3                             |
| Chocolate milk                            | 2                             |
| Cola                                      | 12                            |
| Diet cola                                 | 16                            |
| Energy drinks                             | 30                            |
| Ice tea                                   | 3                             |
| <b>Chocolate and foods with chocolate</b> |                               |
| Milk chocolate                            | 24                            |
| Bitter chocolate                          | 68                            |
| White chocolate                           | 0                             |
| Chocolate waffles                         | 14                            |
| Chocolate sticks                          | 3                             |
| Chocolate dragee                          | 22                            |
| Chocolate biscuits                        | 3                             |
| Chocolate cake                            | 2                             |
| Chocolate cookie                          | 2                             |
| Chocolate ice cream                       | 2                             |
| Chocolate pudding                         | 2                             |
| <b>Foods with cocoa</b>                   |                               |
| Cocoa cake                                | 5                             |
| Cocoa cookies                             | 3                             |
| Cocoa biscuits                            | 3                             |
| Cocoa breakfast cereals                   | 3                             |
| Cocoa pudding                             | 2                             |

Table S1: The participants' chronotype scores of according to some key variables

| Chronotype scores |                    | N   | $\bar{x} \pm SD$         | F/p                |
|-------------------|--------------------|-----|--------------------------|--------------------|
| Sex               | Male               | 477 | 47.39±7.04               | 39.366<br>0.057    |
|                   | Female             | 184 | 48.87±7.07               |                    |
| Smoking Status    | Yes                | 215 | 47.46±9.46               | 9.124<br>0.084     |
|                   | No                 | 446 | 48.87±7.56               |                    |
| Body mass index   | Underweight        | 78  | 51.92±5.82 <sup>a</sup>  | 3.329<br>0.036*    |
|                   | Normal             | 444 | 48.63±7.34 <sup>a</sup>  |                    |
|                   | Overweight /Obese  | 128 | 46.29±11.20 <sup>b</sup> |                    |
| PSQI total score  | Good Sleep Quality | 222 | 49.58±6.86               | 12.287<br><0.001** |
|                   | Poor sleep Quality | 439 | 47.89±8.80               |                    |

The data show presents as mean  $\pm$  standard deviation ( $\bar{x} \pm SD$ ). The analysis of covariance (ANCOVA) was used. The data adjusted for age. \*p<0.05, \*\*p<0.001

Table S2. The relationship between body mass index, sleep quality and chronotype

| Chronotype      | Models  | Chronotype<br>(referent: Morning type) |        |                        |        |
|-----------------|---------|----------------------------------------|--------|------------------------|--------|
|                 |         | Intermediate Type                      |        | Evening Type           |        |
|                 |         | OR<br>(%95 CI)                         | p      | OR<br>(%95 CI)         | p      |
| Body mass index | Model 1 | 2.155<br>(1.239-3.749)                 | 0.008* | 2.246<br>(1.239-5.025) | 0.020* |
|                 | Model 2 | 1.758<br>(1.067-2.998)                 | 0.038* | 1.726<br>(1.039-3.290) | 0.026* |
|                 | Model 3 | 1.318<br>(0.980-2.581)                 | 0.72   | 1.421<br>(1.088-2.574) | 0.048* |
| Sleep Quality   | Model 1 | 2.219<br>(1.177-4.182)                 | 0.011* | 2.476<br>(1.168-5.343) | 0.018* |
|                 | Model 2 | 2.034<br>(1.067-3.878)                 | 0.031* | 2.225<br>(1.129-4.616) | 0.036* |
|                 | Model 3 | 2.019<br>(1.057-3.855)                 | 0.033* | 2.012<br>(1.021-4.594) | 0.049* |

Multinomial Logistic regression was used. Cut points for the outcomes: Body mass index (<25 kg/m<sup>2</sup> vs ≥25 kg/m<sup>2</sup>); Sleep Quality (Pittsburgh Sleep Quality total scores <5 points vs ≥5 points); Model 1: adjusted for age; Model 2: adjusted for age, sex; Model 3: adjusted for age, sex and smoking status. OR: odds ratio; 95% CI: 95% confidence interval. \*p<0.05
